# Supplementary material for: Emetine induces chemosensitivity and reduces clonogenicity of acute myeloid leukemia cells
Source: PubMed Central journal article supplement (PMC5029623; doi:10.18632/oncotarget.8096), 2016-03-15
Supplement: oncotarget-07-23239-s001.pdf [file oncotarget-07-23239-s001.pdf]

# Emetine induces chemosensitivity and reduces clonogenicity of acute myeloid leukemia cells

Supplementary Material

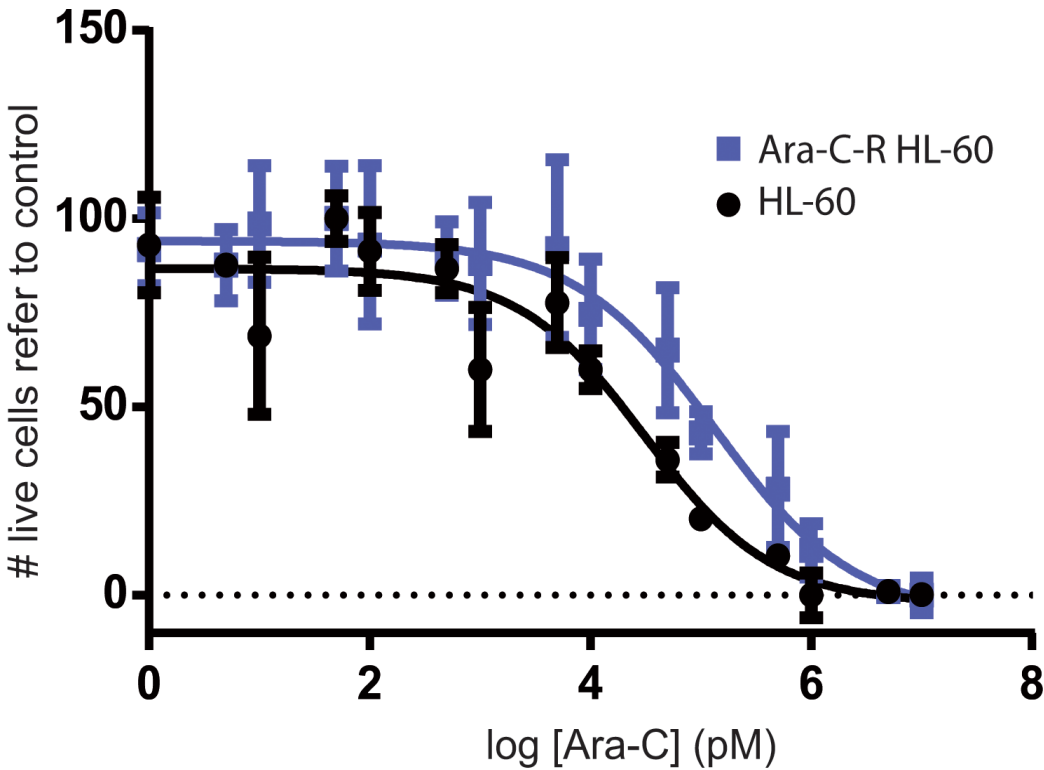

| Cell line     | EC50 (nM) |
|---------------|-----------|
| Ara-C-R HL-60 | 133       |
| HL-60         | 31        |

**Supplementary Figure 1. HL-60 cells resistant to chemotherapeutics.** Cell viability at different Ara-C doses (pM) for 24 h. Blue, Ara-C resistant cells; black, parental cell line.

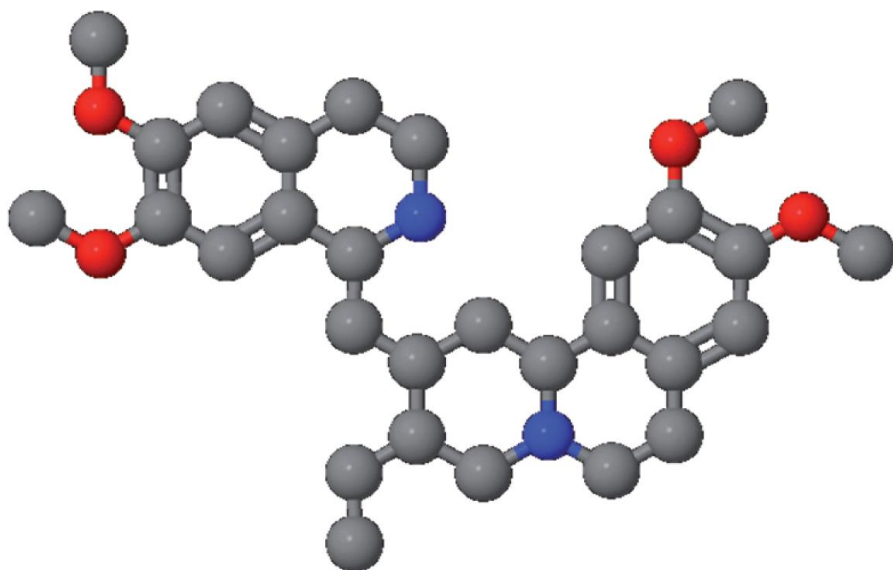

# Emetine

**Supplementary Figure 2. Emetine structure.** Chemical structure of Emetine.

**A**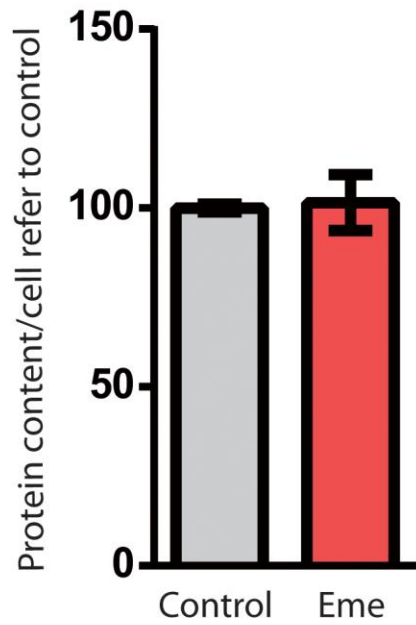**B**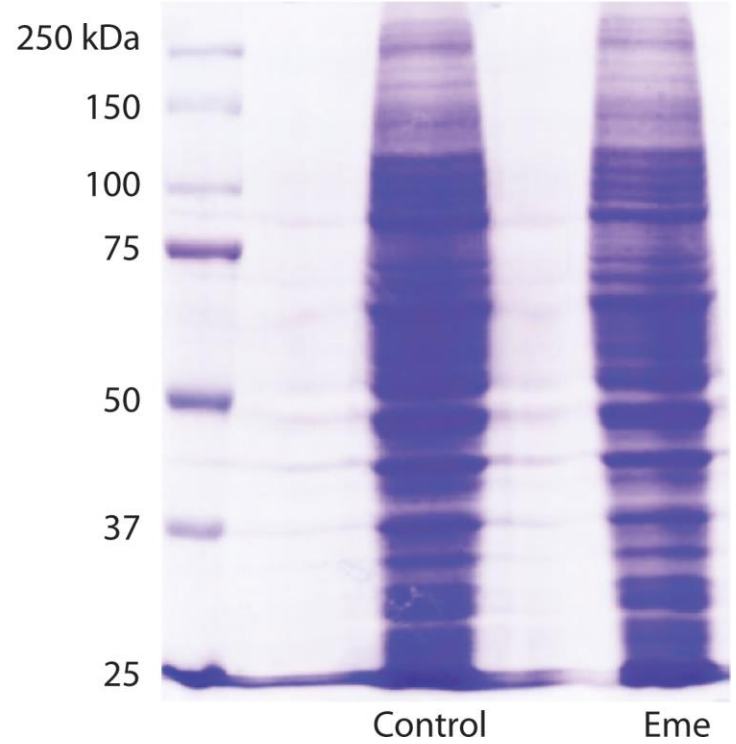

**Supplementary Figure 3. Emetine treatment does not affect the protein profile in HL-60 cells.** HL-60 cells were treated with Emetine and proteins were extracted. **A.** Protein concentration measured by BCA is represented. Bars correspond to the mean value of triplicates and error bars correspond to SEM. **B.** Coomassie-staining profile of control and emetine-treated cells. A representative gel is presented.

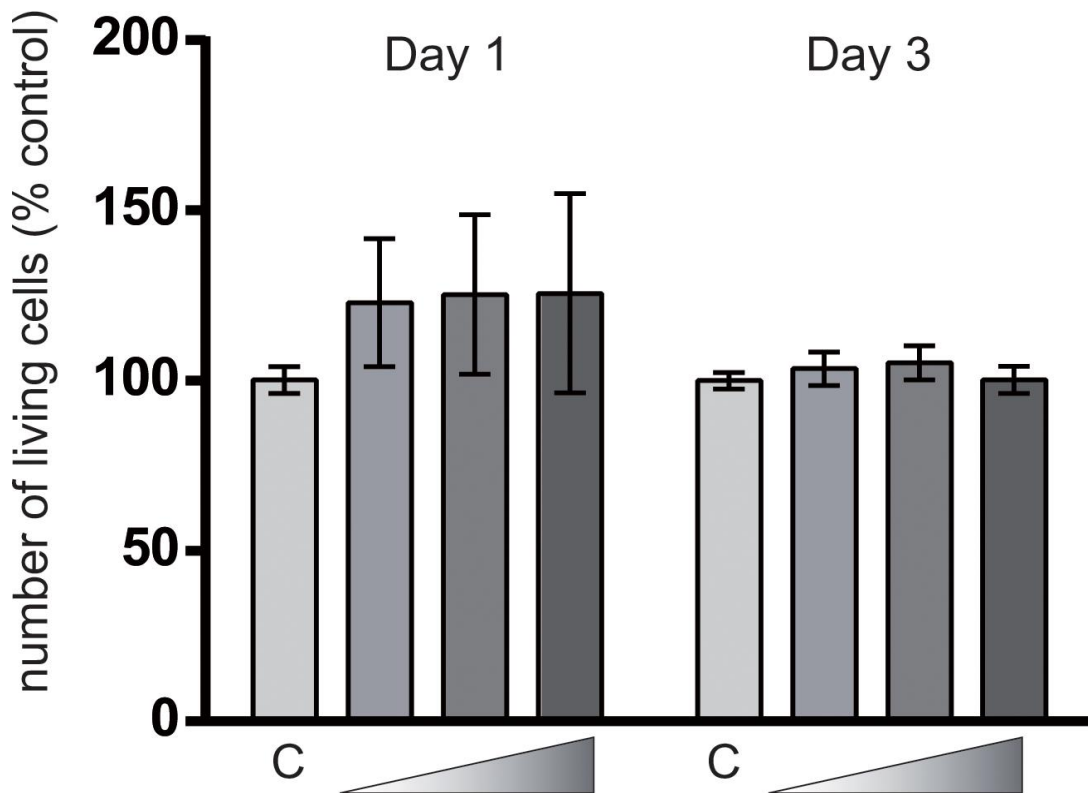

**Supplementary Figure 4. Emetine treatment spares healthy bone marrow cells.** Mature normal bone marrow cells were treated at different concentrations of emetine (1.5, 15, 150 nM). Cell viability was analyzed by flow cytometry at day 1 and 3 after treatment.

**Supplementary Table 1. Genes upregulated during vitamin D3-induced differentiation.**

**Supplementary Table 2. Genes downregulated during vitamin D3-induced differentiation.**

**Supplementary Table 3. AML patients' characteristics.**

| AML sample | Gender | Age (yr) | WHO subtype                             | WBC count# | % Blasts in PB | % Blasts in BM | Karyotype                                                                                                        | Additional molecular features           |
|------------|--------|----------|-----------------------------------------|------------|----------------|----------------|------------------------------------------------------------------------------------------------------------------|-----------------------------------------|
| #1         | M      | 28       | AML without maturation                  | 143        | 98             | 90             | 46,XY                                                                                                            | FLT3-ITD                                |
| #2         | M      | 40       | AML without maturation                  | 52         | 66             | 80             | 46,XY                                                                                                            | Biallelic CEBPA mutation                |
| 3          | F      | 34       | AML with myelodysplasia-related changes | 32         | 16             | 44             | 45,XX, -7                                                                                                        | FLT3 <sup>wt</sup><br>NPM <sup>wt</sup> |
| #4         | M      | 45       | AML with t(6;9)                         | 40         | 58             | 43             | 46,XY,t(6;9)(p23;q34)                                                                                            | FLT3-ITD                                |
| #5         | M      | 48       | AML with t(8;21)(q22;q22)               | 54         | 5              | 24             | 46,XY,t(8;21)(q22;q22)                                                                                           | NPM <sup>wt</sup><br>FLT3 N/A           |
| #6         | M      | 61       | AML with t(8;21)(q22;q22)               | 21.4       | 51             | 89             | 45,X-Y,t(8;21)(q22;q22)/46,XY                                                                                    | FLT3 <sup>wt</sup><br>NPM <sup>wt</sup> |
| #7         | F      | 58       | AML with myelodysplasia-related changes | 100.7      | 45             | 80             | 46,XX,del(5)(q23q33), t(8;9)(p11;q34)                                                                            | FLT3 <sup>wt</sup><br>NPM <sup>wt</sup> |
| #8         | M      | 24       | AML with myelodysplasia-related changes | 7.1        | 83             | 30             | 46,XY                                                                                                            | FLT3 <sup>wt</sup><br>NPM <sup>wt</sup> |
| #9         | M      | 49       | AML with myelodysplasia-related changes | 76.4       | 42             | 26             | 46-47,XY,del(5)(q22q34),del(6)(q22q25),del(7)(q22q23),-8,-9,add(11)(q23),+i(11)(q11),-16,+mar1,+mar2,+mar3[cp8]. | FLT3 <sup>wt</sup><br>NPM <sup>wt</sup> |
| #10        | M      | 22       | AML with t(8;21)(q22;q22);              | 20.4       | 83             | 69             | 45,X,-Y,t(8;21)(q22;q22)/46,XY                                                                                   | FLT3 ITD                                |
| #11        | F      | 60       | AML with myelodysplasia-related changes | 218.1      | 68             | 36             | 48,XX,+8,+21                                                                                                     | FLT3 <sup>wt</sup><br>NPM <sup>wt</sup> |
| #12        | M      | 63       | AML with myelodysplasia-related changes | 55         | 84             | 21             | 46,XY                                                                                                            | FLT3 ITD                                |
| #13        | M      | 61       | AML with mutated NPM1                   | N/A        | 33             | 72             | 46,XY                                                                                                            | NPM1 mut<br>DNMT3A mut                  |

**Supplementary Table 4. Primer sequences.**

| Primer                 | Sequence                 |
|------------------------|--------------------------|
| GAPDH forward          | GTGGACCTGACCTGCCGTCT     |
| GAPDH reverse          | GGAGGAGTGGGTGTCGCTGT     |
| PU.1 forward           | GGGGTGG AAGTCCCAGTAAT    |
| PU.1 reverse           | ACGGATCTATACCAACGCCA     |
| C/EBP $\alpha$ forward | TTGCTGCCTTCCTTTCTACTGC   |
| C/EBP $\alpha$ reverse | GCTGGAGAGGATGGACTTACTTGA |
| ABCB1 forward          | CCCATCATTGCAATAGCAGG     |
| ABCB1 reverse          | TGTTCAA ACTTCTGCTCCTGA   |
| Bcl-X forward          | GAGGCAGGCGACGAGTTTGAA    |
| Bcl-X reverse          | TGGGAGGGTAGAGTGGATGGT    |
